# Supplementary material for: Should Carbohydrate Intake Be More Liberal during Oral and Enteral Nutrition in Type 2 Diabetic Patients?
Source: MDPI journal article supplement (doi:10.3390/nu15020439), 2023-01-14
Supplement: s1 [file s1]

**Supplementary Table S1. Characteristic of patients included in this study**

| Patient                      |   | Age<br>[years] | Height<br>[cm] | Weight<br>[kg] | Purpose of<br>hospital stay <sup>1</sup> | Comorbidities <sup>2</sup> | Diabetes<br>treatment <sup>3</sup> |
|------------------------------|---|----------------|----------------|----------------|------------------------------------------|----------------------------|------------------------------------|
| <b>T2DM patients</b>         |   |                |                |                |                                          |                            |                                    |
| 1                            | M | 74             | 171            | 111            | R, WH                                    | CLI, CHD, COPD             | Ins                                |
| 2                            | M | 57             | 174            | 95             | R, WH                                    | CLI, CHD, HBP              | Ins                                |
| 3                            | F | 75             | 150            | 60             | R, WH                                    | CLI, CHD, HBP              | Met                                |
| 4                            | F | 66             | 165            | 113            | R, WH                                    | CLI, CHD, HBP              | Met                                |
| 5                            | F | 79             | 154            | 56             | R, WH                                    | CLI                        | Met                                |
| 6                            | F | 82             | 153            | 60             | R                                        | BF                         | Met                                |
| 7                            | M | 57             | 168            | 94             | R, WH                                    | FG, LC                     | -                                  |
| 8                            | M | 59             | 180            | 90             | R, WH                                    | CLI, CHD, HBP              | Ins, GLP                           |
| 9                            | F | 70             | 159            | 102            | R, WH                                    | CLI, VLU                   | -                                  |
| 10                           | F | 76             | 158            | 113            | R                                        | VLU                        | Ins                                |
| 11                           | M | 70             | 171            | 82             | R, WH                                    | VLU, CHD, HBP              | Ins                                |
| 12                           | F | 79             | 170            | 72             | R                                        | CI                         | -                                  |
| 13                           | M | 89             | 167            | 59             | R, WH                                    | CLI, CHD, HBP              | Sul                                |
| 14                           | F | 85             | 165            | 94             | R, WH                                    | VLU, HBP                   | Ins, Sul                           |
| Mean ± STD                   |   | 72.7 ± 9.8     | 164.6 ± 8.4    | 85.8 ± 20.3    |                                          |                            |                                    |
|                              |   |                |                |                |                                          |                            |                                    |
| <b>Non-diabetic patients</b> |   |                |                |                |                                          |                            |                                    |
| 1                            | F | 76             | 168            | 70             | R                                        | BF                         | -                                  |
| 2                            | M | 81             | 152            | 76             | R, WH                                    | PU                         | -                                  |
| 3                            | F | 83             | 160            | 77             | R, WH                                    | VLU                        | -                                  |
| 4                            | F | 88             | 162            | 61             | R, WH                                    | VLU                        | -                                  |
| 5                            | F | 87             | 170            | 68             | R, WH                                    | VLU                        | -                                  |
| 6                            | F | 71             | 170            | 75             | R, WH                                    | CLI, CHD, HBP              | -                                  |
| 7                            | F | 66             | 163            | 81             | R, WH                                    | VLU                        | -                                  |
| Mean ± STD                   |   | 78.9 ± 7.6     | 163.6 ± 6.0    | 72.6 ± 6.2     |                                          |                            |                                    |

<sup>1</sup> R – rehabilitation, WH – wound healing

<sup>2</sup> CLI – chronic limb ischemia, CHD – coronary heart disease, COPD- chronic obstructive pulmonary disease, HBP – high blood pressure, BF – bone fractures, FG - Fournier gangrene and abdominal wall necrosis, LC – liver cirrhosis, VLU – venous leg ulcer, CI - cerebral infarction, PU – pressure ulcer

<sup>3</sup> Ins – insulin, Met – metformin, Sul – sulfonylurea, GLP - glucagon-like peptide-1 analogues
